# Supplementary material for: Effects of Massive Use of Disinfectants on the Plankton Communities in Lakes from Wuhan
Source: MDPI journal article supplement (doi:10.3390/w15223875), 2023-11-07
Supplement: s1 [file s1]

Table S1. The details information of the sampling sites

| site  | Lat (°N) | Lon (°W) |
|-------|----------|----------|
| NHS1  | 30.47607 | 114.3667 |
| NHS2  | 30.48609 | 114.3787 |
| NHS3  | 30.49347 | 114.3631 |
| NHS4  | 30.49276 | 114.3519 |
| NHS5  | 30.48786 | 114.3457 |
| NHS6  | 30.49755 | 114.3386 |
| NHS7  | 30.50182 | 114.3484 |
| BHS1  | 30.59979 | 114.5147 |
| BHS2  | 30.60267 | 114.5132 |
| BHS3  | 30.60477 | 114.5144 |
| BHS4  | 30.61391 | 114.5122 |
| BHS5  | 30.62042 | 114.5046 |
| MSHS1 | 30.54308 | 114.207  |
| MSHS2 | 30.54933 | 114.2125 |
| MSHS3 | 30.54399 | 114.2167 |
| MSHS4 | 30.54479 | 114.2265 |
| MSHS5 | 30.54781 | 114.2244 |
| MSHS6 | 30.53781 | 114.2323 |
| LHHS1 | 30.55321 | 114.2725 |
| LHHS2 | 30.55385 | 114.2712 |
| LHHS3 | 30.55231 | 114.2743 |
| YHS1  | 30.55745 | 114.2577 |
| YHS2  | 30.55744 | 114.2577 |
| YHS3  | 30.55676 | 114.2576 |
| XBHS1 | 30.60059 | 114.2628 |
| XBHS2 | 30.59999 | 114.2623 |
| XBHS3 | 30.59857 | 114.2652 |
| HZHS1 | 30.59884 | 114.2774 |
| HZHS2 | 30.59847 | 114.2799 |
| HZHS3 | 30.59828 | 114.2798 |
| SHS1  | 30.57257 | 114.3427 |
| SHS2  | 30.57256 | 114.3425 |
| SHS3  | 30.57387 | 114.334  |
| DHS1  | 30.54613 | 114.3655 |
| DHS2  | 30.53452 | 114.3719 |
| DHS3  | 30.53811 | 114.3727 |
| DHS4  | 30.56391 | 114.3472 |
| LZHS1 | 30.24567 | 114.4505 |
| LZHS2 | 30.2395  | 114.4566 |
| LZHS3 | 30.2445  | 114.4505 |
| CHS1  | 30.32038 | 113.8178 |
| CHS2  | 30.31507 | 113.8169 |
| CHS3  | 30.31274 | 113.8201 |
